# Supplementary material for: Energy generation through bioelectrochemical degradation of pentachlorophenol in microbial fuel cell
Source: Royal Society of Chemistry journal article supplement (doi:10.1039/c8ra01643g), 2018-01-01
Supplement: c8ra01643g1.pdf [file c8ra01643g1.pdf]

## 1 Supplementary Information (SI)

2

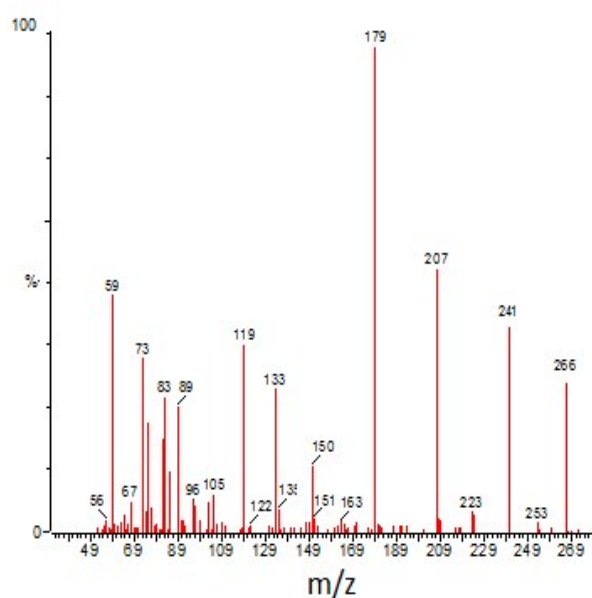

(a) Pure PCP m/z 266.5

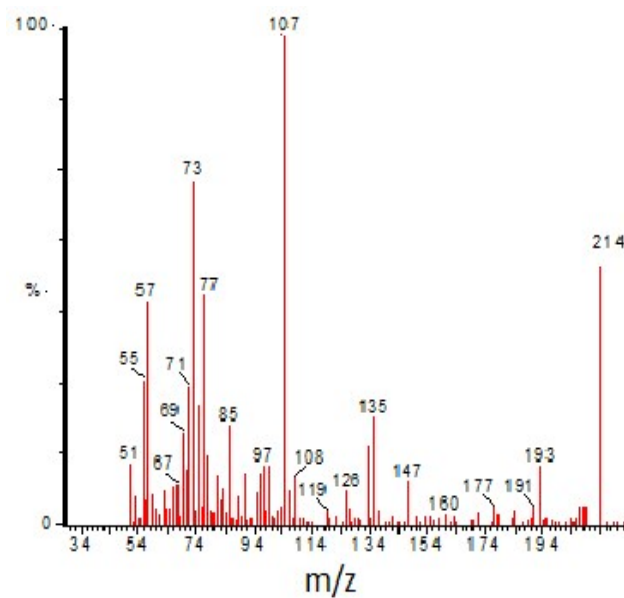

(b) 2,3,6-Trichloroquinone m/z 213

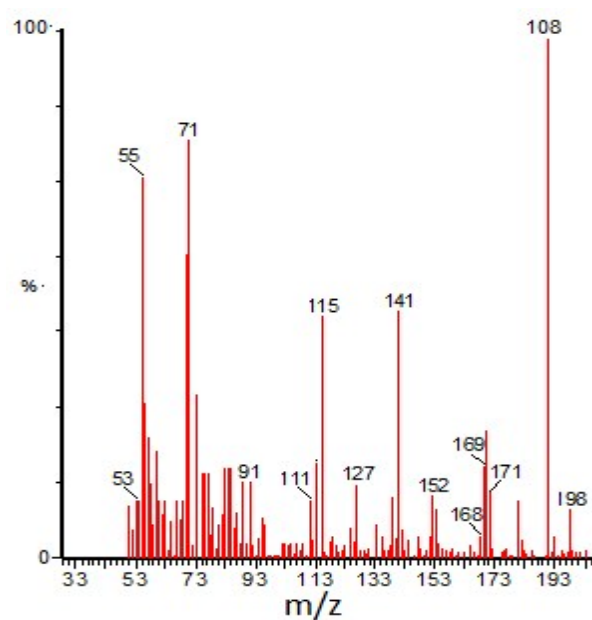

(c) 2,4,6-TCP m/z 197

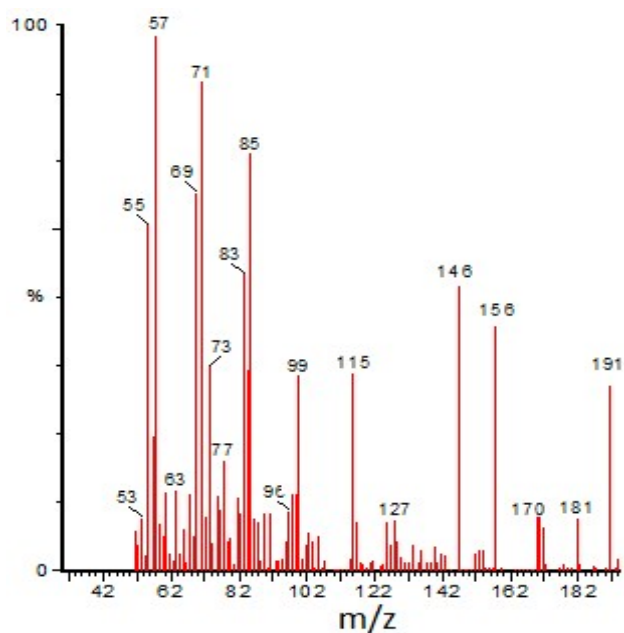

(d) Chloromaleyl acetic acid m/z 190

3

**Fig. 1S** MS Spectra of the metabolites of PCP formed under aerobic conditions

4

1

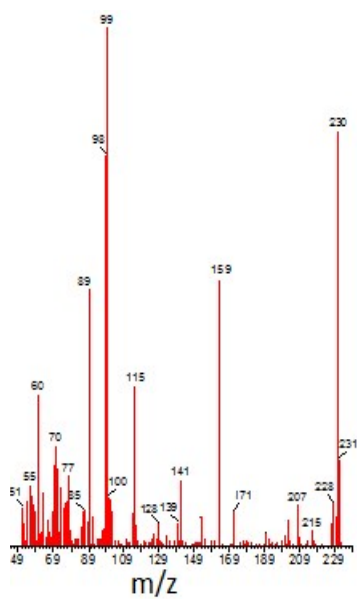

(a) 2,3,4,5-Tetrachlorophenol  
m/z 131

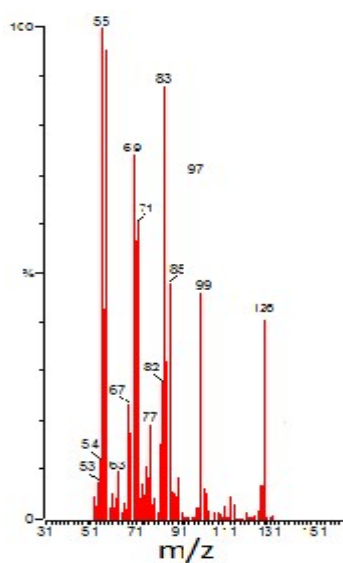

(b) 3-Chlorophenol  
m/z 126.5

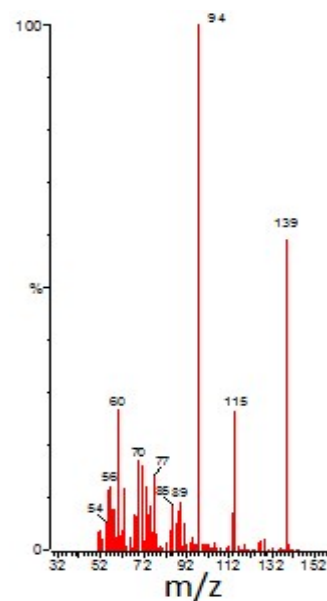

(c) 4-Hydroxy benzoate  
m/z 138

2

**Fig. 2S** MS Spectra of the metabolites of PCP formed under anaerobic

3

conditions

4

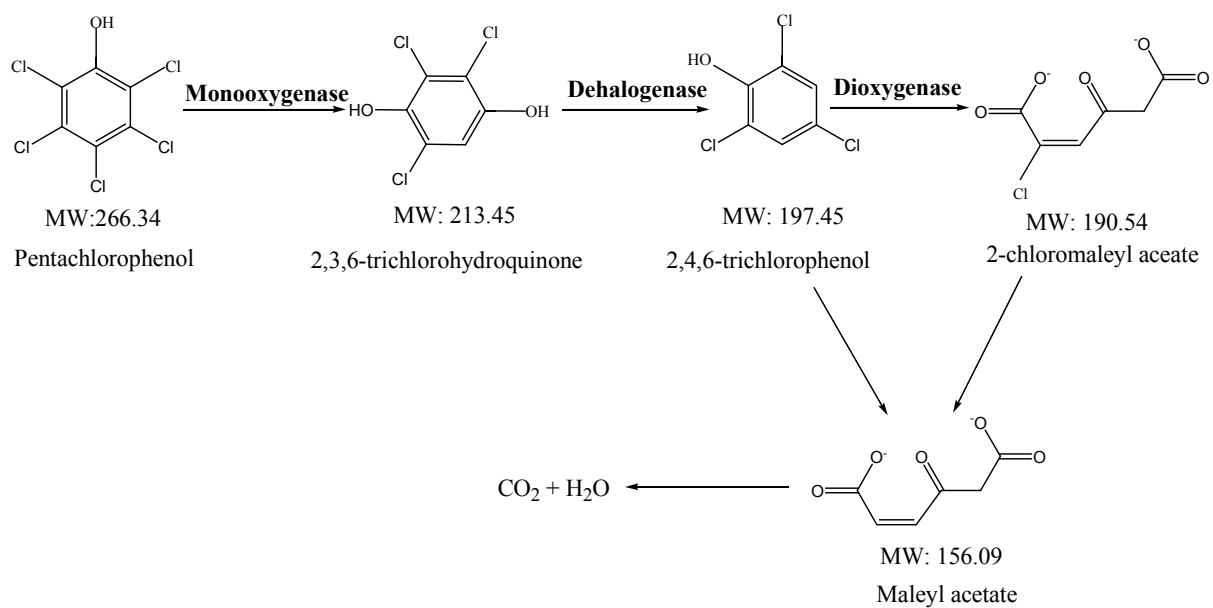

1  
2

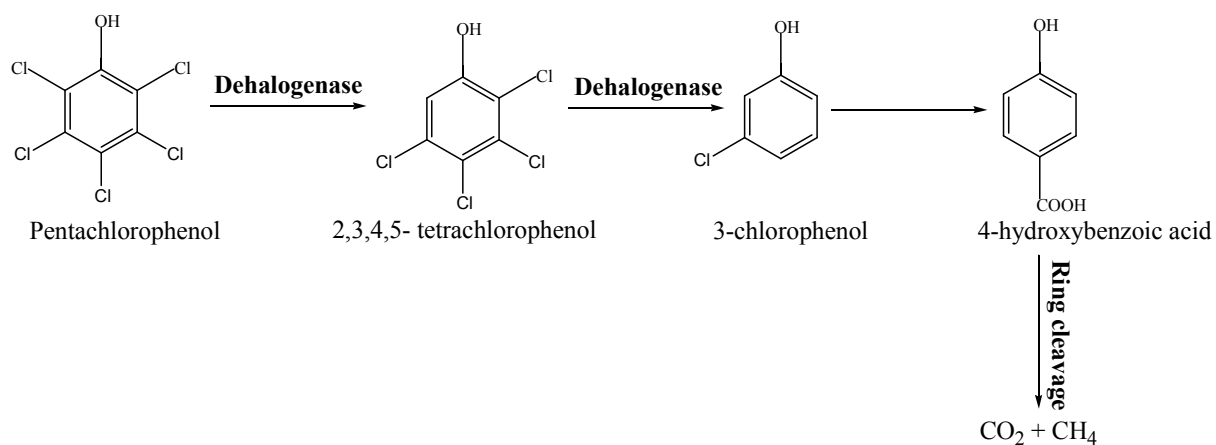

3  
4

5 **Fig. 3S** Proposed degradation pathway of PCP under (a) aerobic conditions, and (b)  
6 anaerobic conditions

7

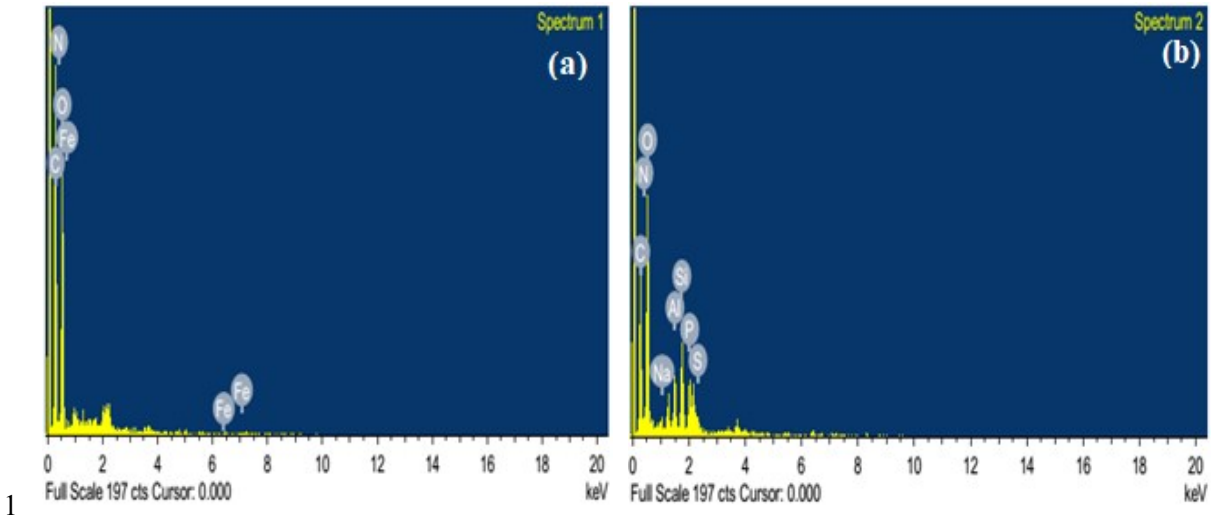

1

2

**Fig. 4S** EDX of microbial sludge of (a) SCMFC and (b) DCMFC

3

4

5

6

7
